# Supplementary material
Source: Springer Nature journal article supplement (https://www.springermedizin.de/resource/supplementary/13023_2013_891_MOESM1_ESM.pdf/9642920)
Supplement: MOESM1 [file 9642920]

**Supplementary Figure 1.** Twelve out of 13 French 428\_451dup (24pb) Families diagnosed between 2002 and 2006, included in the study. Red arrow: patients who participated to the clinical study. Green asterisk: patients who were included in the clinical study but did not participate to the videotaped praxis study.

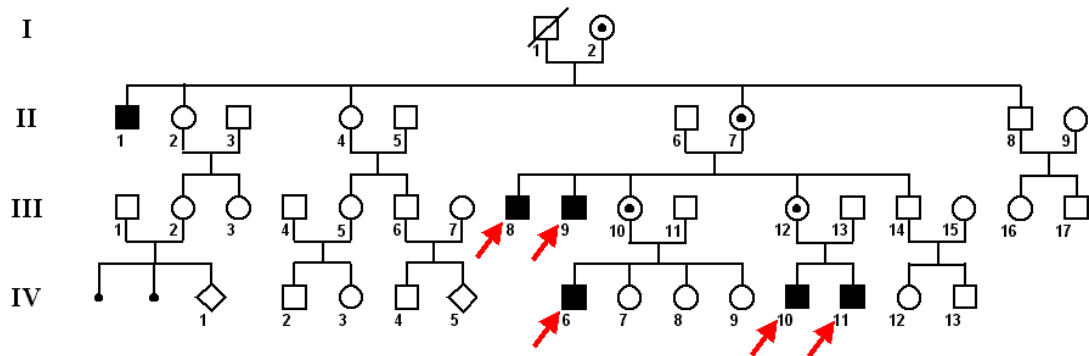

**Family I.** Five of 6 patients available; published as “P73, non specific MR” in Bienvenu et al., 2002

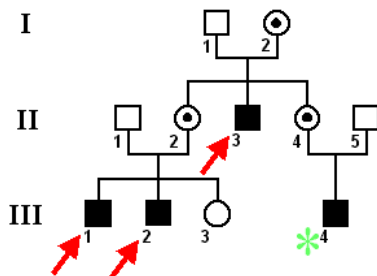

**Family II.** Four patients available, one too young for videotape study. (published as P49, “MR with mild hand dystonia” in Bienvenu et al., 2002)

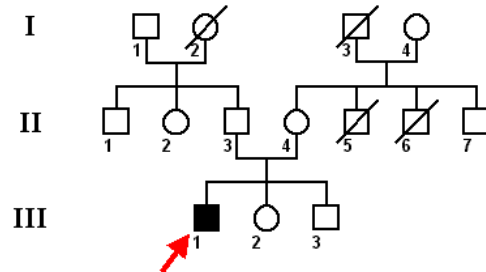

**Family III.** One sporadic case with speech apraxia and Partington syndrome (unpublished)

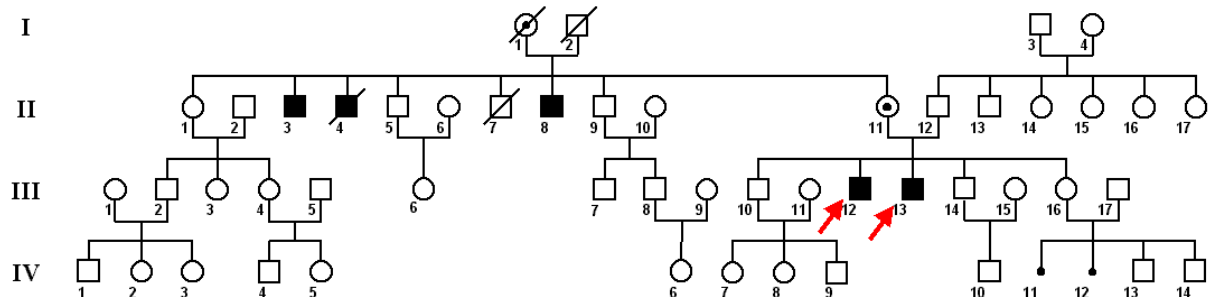

**Family IV.** Two of 4 alive patients available, the other two were too old (published as P104, “non specific MR” in Poirier et al., 2006)

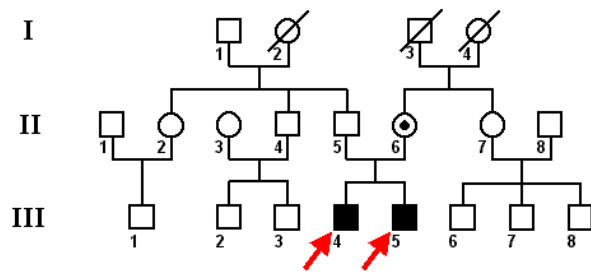

**Family V.** A brother pair, one too severe for videotape study, unpublished.

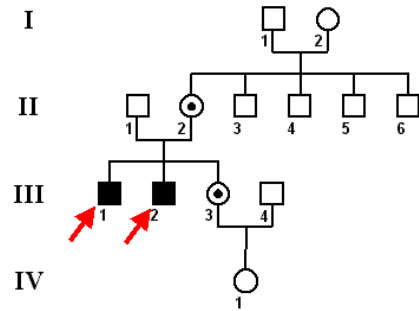

**Family VI.** Published as P106, “non specific MR”, in Poirier et al., 2006.

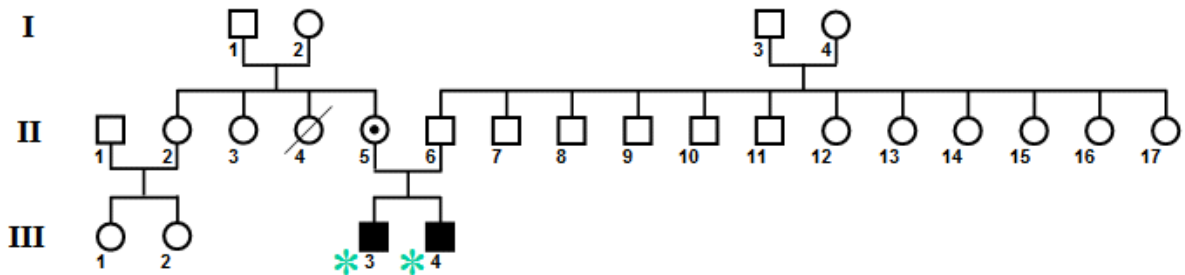

**Family VII.** Two boys available, both too young for videotape study; unpublished.

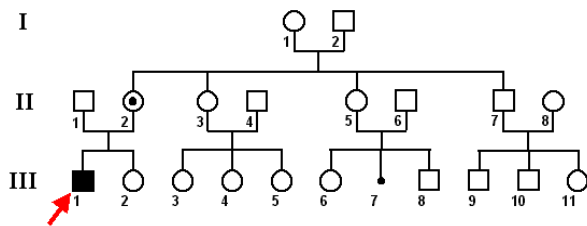

**Family VIII.** Sporadic case, mild hand dyspraxia; unpublished.

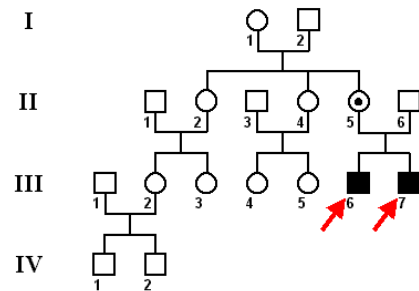

**Family IX.** Partington, P34 in Poirier et al., 2006)

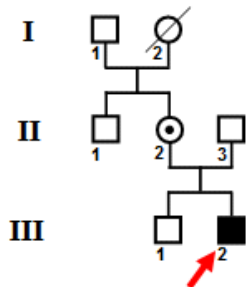

**Family X.** One sporadic case too severe for videotape study, in Cossee et al, 2010.

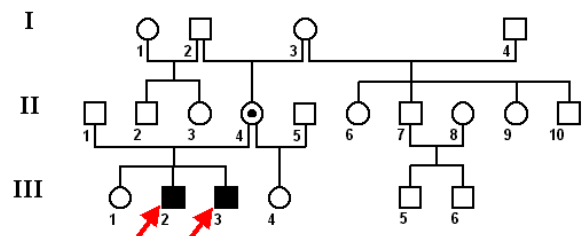

**Family XI.** Two available patients, unpublished

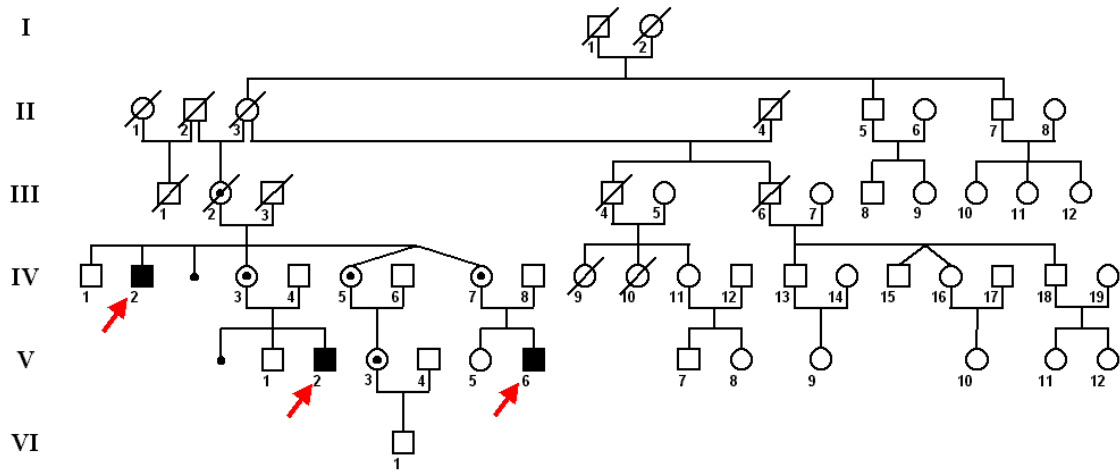

**Family XII.** Three patients available, one too severely affected did not participate to the videotape study; published as T37 « Non specific MR » in Poirier et al., 2006.
